# Supplementary material
Source: MDPI journal article supplement (https://www.mdpi.com/1999-4907/14/5/862)
Supplement: s1 [file s1]

## Supplemental materials

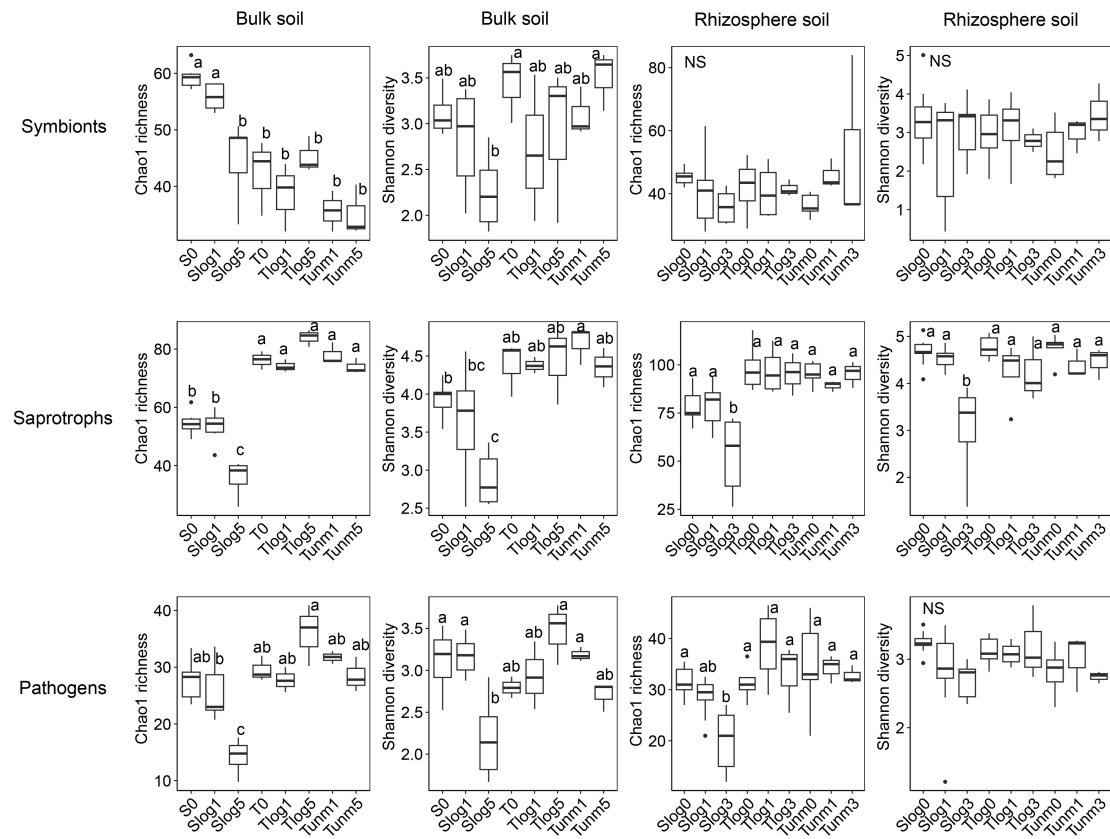

**Figure S1.** Alpha diversity of trophic groups of soil fungi. Letters represent difference among infected years and treatments at the significance level ( $P < 0.05$ ). NS represent no significant difference among infected years or treatments. S, forest plots in Suichang County; T, forest plots in Taishun County; 0, uninfected plot; log1, logged plot or pine individuals after 1-year disease infection; log5, logged plot after 5-year disease infection; log3, logged pine individuals after 3-year disease infection; unm3, unmanaged pine individuals after 3-year disease infection.

**Table S1.** Relative abundance of bacterial phylum taxa in all samples of bulk soil and Masson pine rhizosphere soil.

| Phylum taxa              | Relative abundance in bulk soil (%) | Relative abundance in rhizosphere soil (%) |
|--------------------------|-------------------------------------|--------------------------------------------|
| <i>Acidobacteriota</i>   | 42.3                                | 41.2                                       |
| <i>Proteobacteria</i>    | 30.4                                | 34.1                                       |
| <i>Actinobacteriota</i>  | 12.4                                | 5.3                                        |
| <i>Verrucomicrobiota</i> | 5.6                                 | 6.4                                        |
| Unclassified             | 4.2                                 | 5.0                                        |
| <i>Chloroflexi</i>       | 1.9                                 | 1.4                                        |
| <i>Planctomycetota</i>   | 1.6                                 | 3.0                                        |
| <i>Myxococcota</i>       | 1.2                                 | 1.1                                        |
| Others                   | 2.3                                 | 2.3                                        |

**Table S2.** Relative abundance of fungal phylum taxa in all samples of bulk soil and Masson pine rhizosphere soil.

| Phylum taxa              | Relative abundance in bulk soil (%) | Relative abundance in rhizosphere soil (%) |
|--------------------------|-------------------------------------|--------------------------------------------|
| <i>Ascomycota</i>        | 49.4                                | 56.0                                       |
| <i>Basidiomycota</i>     | 43.1                                | 34.3                                       |
| Unclassified             | 3.9                                 | 5.4                                        |
| <i>Mortierellomycota</i> | 2.3                                 | 2.9                                        |
| Others                   | 1.1                                 | 1.7                                        |

**Table S3.** Analysis of covariance on microbial alpha diversity in bulk soil, with PWD-infected years and management treatments (logging vs unmanaged) as fixed factor, and NMDS axis of woody plant community (NMDS1 and NMDS2) as covariate. \*,  $P < 0.05$ ; \*\*,  $P < 0.01$ ; \*\*\*,  $P < 0.001$ .

| Sites    | Factors    | Bacterial      | Bacterial         | Fungal         | Fungal            |
|----------|------------|----------------|-------------------|----------------|-------------------|
|          |            | Chao1 richness | Shannon diversity | Chao1 richness | Shannon diversity |
| Suichang | Years      | 0.13           | 0.43              | 8.12**         | 1.57              |
|          | NMDS1      | 1.00           | 2.79              | 0.38           | 0.60              |
|          | NMDS2      | 31.18***       | 8.71*             | 52.95***       | 7.84*             |
| Taishun  | Years      | 1.13           | 0.25              | 4.62*          | 0.43              |
|          | NMDS1      | 0.58           | 0.16              | 0.00           | 0.14              |
|          | NMDS2      | 0.32           | 0.09              | 0.04           | 0.31              |
| Taishun  | Treatments | 2.88           | 4.25*             | 6.99*          | 0.71              |
|          | NMDS1      | 0.89           | 0.28              | 0.00           | 0.14              |
|          | NMDS2      | 0.50           | 0.16              | 0.05           | 0.33              |
